# Supplementary material for: Different responses to DNA damage determine ageing differences between organs
Source: PubMed Central journal article supplement (PMC9009128; doi:10.1111/acel.13562), 2022-03-04

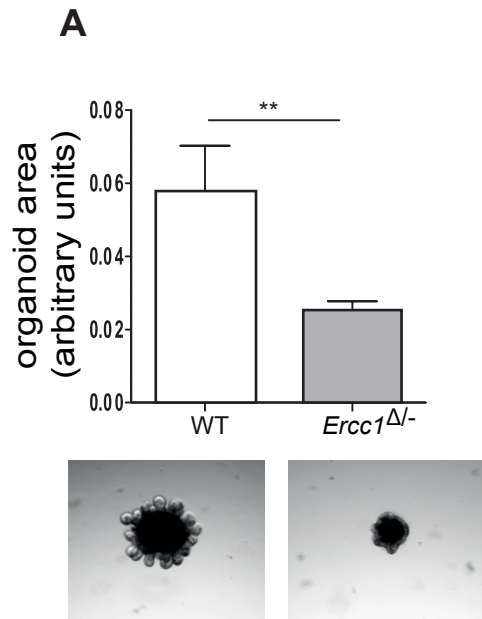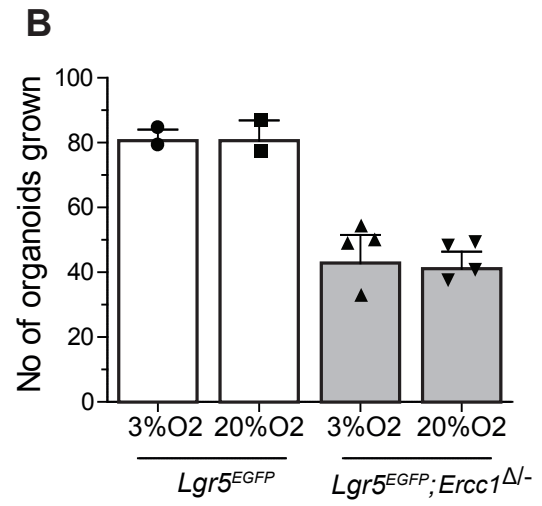

Supplement: ACEL-21-e13562-s005.pdf [file ACEL-21-e13562-s005.pdf]
